# Supplementary material
Source: bioRxiv or medRxiv preprint supplement (https://www.biorxiv.org/highwire/filestream/62242/field_highwire_adjunct_files/5/130948-4.pdf)
Supplement: Supplementary file [file 130948-4.pdf]

# Supplementary Figure 4

**a**

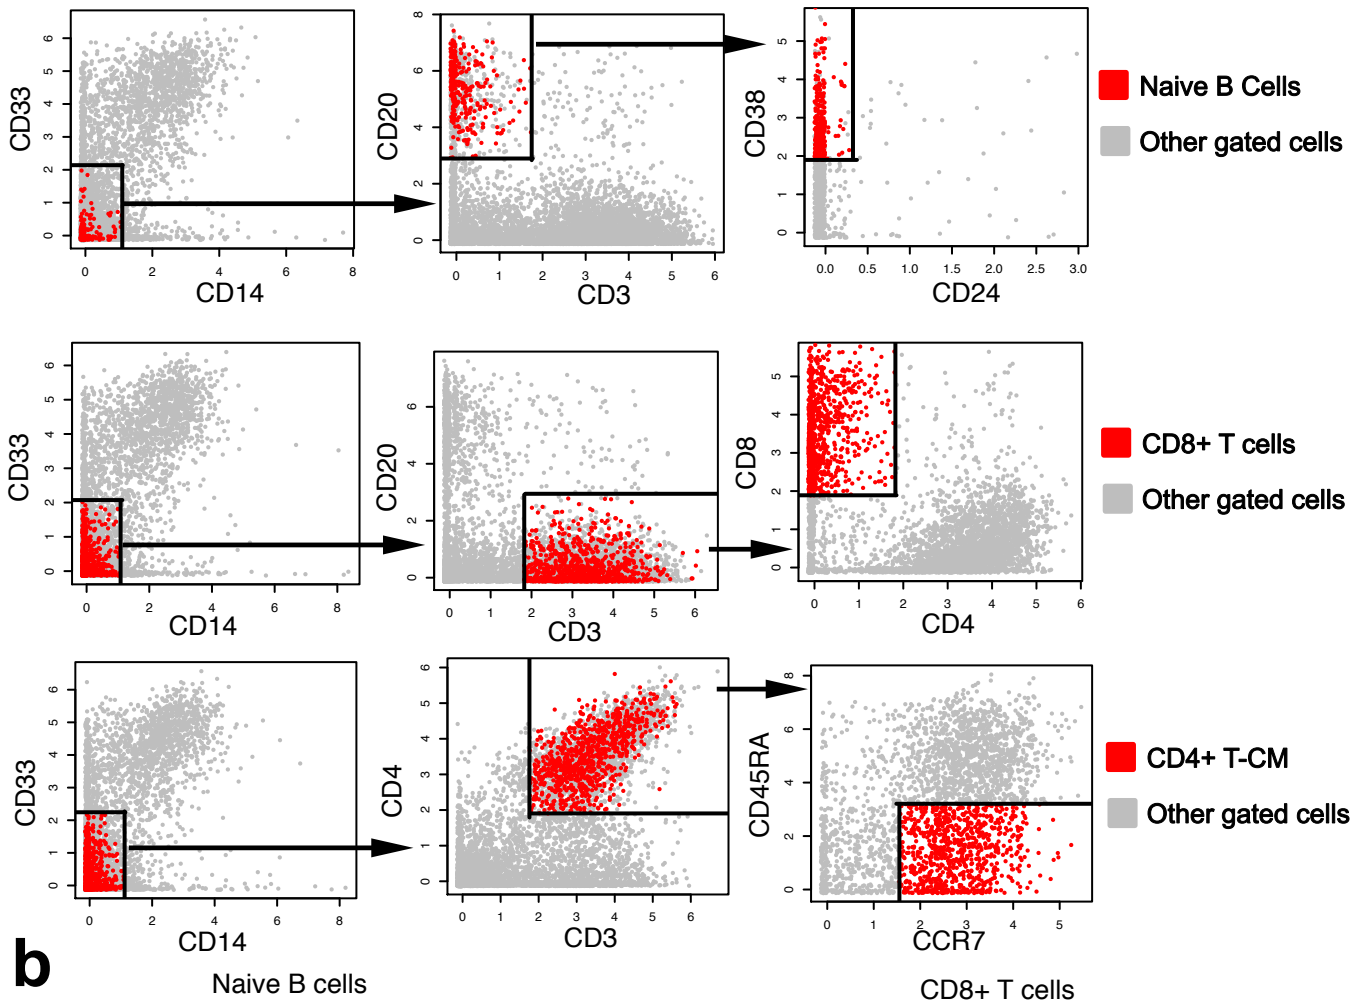

**b**

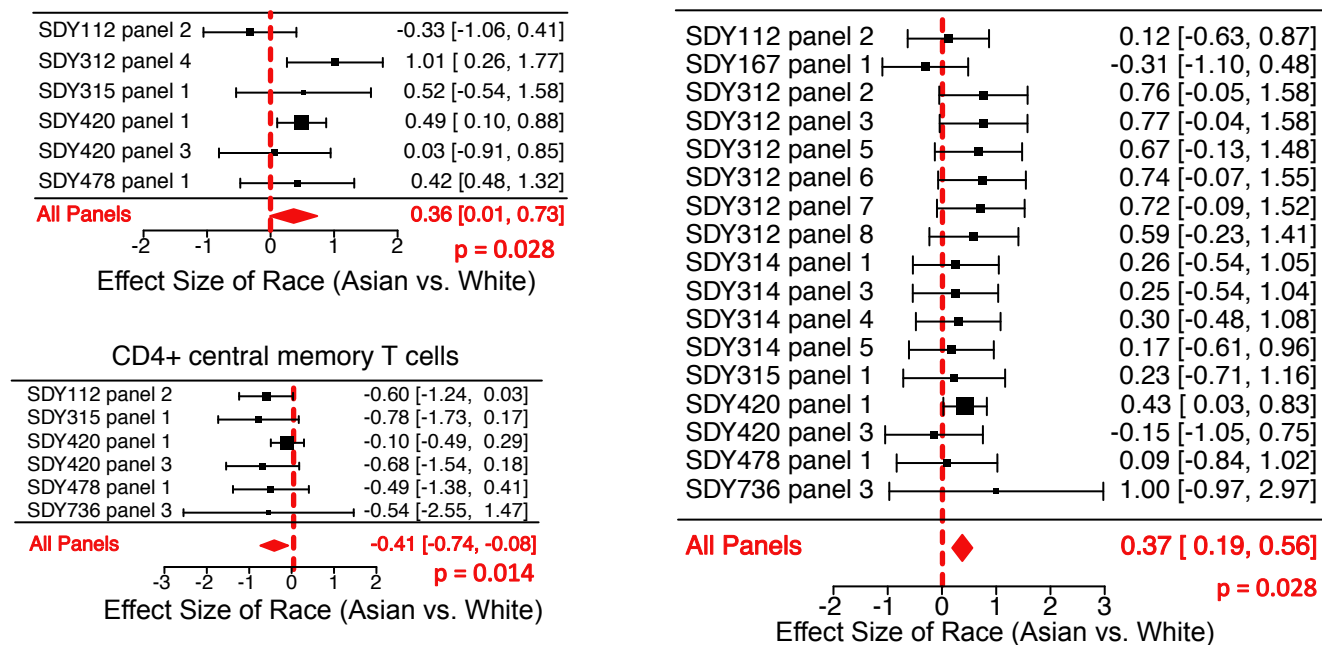

Supplementary Figure 4: Racial differences identified by MetaCyto are consistent across cytometry panels. **(a)** Representative 2D plots visualizing the cell subsets (Naïve B cells, CD8+ T cells and CD4+ central memory T cells) identified by MetaCyto. Red dots represent the cells identified by MetaCyto. Grey dots represent other cells in the gate. Data from SDY420 are shown as examples. **(b)** Forest plots showing the effect size of race (Asian compare to White) estimated in each cytometry panel for Naïve B cells, CD8+ T cells and CD4+ central memory T cells. The effect sizes were estimated within each panel first, and were combined using a random effect model.
